# Supplementary material for: Secondary contact between diverged host lineages entails ecological speciation in a European hantavirus
Source: PLoS Biol. 2019 Feb 20;17(2):e3000142. doi: 10.1371/journal.pbio.3000142 (PMC6382107; doi:10.1371/journal.pbio.3000142)
Supplement: S3 Table — Clade model C implemented in the software PAML was fitted to individual TULV genome segments with data partitioned according to TULV-CEN.S and TULV-EST.S phylogenetic clades. The ratios of nonsynonymous to synonymous substitutions (ω = dN/dS) are indicated for different site classes (ω0, ω1, and ωd) such that the divergent site class ωd evolves differently among partitions. The proportion of each site class is given in parenthesis. lnL was compared to the null-model M2a_rel, which does not allow divergence of ω in the third site class. The number of model parameters and the ratio of transitions to transversions are indicated, as well as the D value of the LRT and p-values deduced from a χ2 distribution with 1 degree of freedom. CmC, clade model C; dN/dS, ratio of nonsynonymous to synonymous substitutions; L, large genome segment; lnL, model likelihood; LRT, likelihood ratio test; M, medium genome segment; np, the number of model parameters; S, small genome segment; TULV, Tula orthohantavirus; TULV-CEN.S, Central South TULV; TULV-EST.S, Eastern South TULV; κ, transition to transversion ratio. (XLSX) [file pbio.3000142.s009.xlsx]

## Sheet: S3_clade-models
Segment	Partition	Model	np	lnL	κ	ω0	ω1	ωd1 / ωd2	LRT	p-value
S		M2a_rel	26	-3556.8	6.27164	0.13721 (5.617%)	1 (0.000%)	0 (94.383 %)
	TULV-CEN.S	CmC	27	-3556.46	6.2973	0 (0.000%)	1 (0.580%)	0.00809 (99.420%)	0.670894	0.41274
								CS: 0.000
	TULV-EST.S	CmC	27	-3556.66	6.26659	0 (94.354%)	1 (0.000%)	0.15254 (5.646%)	0.274212	0.60052
								ES: 0.10693
M		M2a_rel	26	-10294.9	8.39826	0.00221 (99.015%)	1 (0.000%)	0.32224 (0.985%)
	TULV-CEN.S	CmC	27	-10286	8.80398	0.000 (84.683%)	1 (0.437%)	0.03554 (14.880%)	17.8169	< 0.001
								CS: 0.01654
	TULV-EST.S	CmC	27	-10295.2	8.80391	0.000 (84.683 %)	1 (0.437%)	0.01654 (14.88%)	-0.646636	1
								ES: 0.03554
L		M2a_rel	26	-19740.2	6.6658	0.19238 (2.151%)	1 (0.000%)	0.00372 (97.849%)
	TULV-CEN.S	CmC	27	-19736.7	6.68653	0.00347 (97.508%)	1 (0.000%)	0.10903 (2.492%)	6.95234	0.00837097
								CS: 0.27207
	TULV-EST.S	CmC	27	-19739.2	6.62006	0.00368 (97.775%)	1 (0.000%)	0.22206 (2.225%)	2.06183	0.151029
								ES: 0.13244
