# Supplementary material for: Secondary contact between diverged host lineages entails ecological speciation in a European hantavirus
Source: PLoS Biol. 2019 Feb 20;17(2):e3000142. doi: 10.1371/journal.pbio.3000142 (PMC6382107; doi:10.1371/journal.pbio.3000142)
Supplement: S6 Table — Nonsynonymous to synonymous substitutions ratios (ω = dN/dS) are shown for each site class for models M0–M3 (ω0–ω2). For models M7–M8, the shape parameters p and q describing the beta distribution are indicated as well as ωp for the positively selected site class in models M8 and M8a. The proportions of sites in each site class are listed in parenthesis. Model likelihoods were compared to a null model using an LRT. df, degrees of freedom; lnL, model likelihood; LRT, the D value of a likelihood ratio test; np, number of model parameters; p-value: the p-value derived from a χ2 distribution; κ, transition to transversion ratio; TULV, Tula orthohantavirus. (XLSX) [file pbio.3000142.s012.xlsx]

## Sheet: S6_site-models
Segment	Model	np	lnL	κ	ω0 / p	ω1 / q	ω2 / ωp	Null-model	LRT	df	p-value
S	M0	23	-3561.07	6.26071	0.00728
	M1a	24	-3559.95	6.31109	0.005 (99.458%)	1 (0.542%)		M0	2.24414	1	0.134122
	M2a	26	-3559.95	6.31109	0.005 (99.459%)	1 (0.541%)	41.511 (0.000%)	M1a	0	2	1
	M7	24	-3557.16	6.26732	0.01308	0.49286		M0	7.82388	4	0.098247
	M8a	25	-3558.5	6.2631	0.03119	0.64674	1 (0.001%)
	M8	26	-3557.16	6.26814	0.01302	0.48957	1 (0.001%)	M7	-0.00455	2	1
								M8a	2.68599	1	0.101235
M	M0	23	-10320.3	7.78422	0.00417
	M1a	24	-10299.7	8.59633	0.003 (99.367%)	1 (0.633%)		M0	41.2765	1	< 0.001
	M2a	26	-10299.7	8.5965	0.003 (99.367%)	1 (0.633%)	53.038 (0.000%)	M1a	0	2	1
	M7	24	-10299.1	7.8989	0.01469	0.7979		M0	42.5055	4	< 0.001
	M8a	25	-10297.3	8.51118	0.0072	0.06688	1 (0.475%)
	M8	26	-10296.7	8.43704	0.06274	13.601	1 (0.397%)	M7	4.71987	2	0.0944265
								M8a	1.12841	1	0.288115
L	M0	23	-19783.7	6.58484	0.00698
	M1a	24	-19758.8	6.70902	0.005 (99.441%)	1 (0.559%)		M0	49.8981	1	< 0.001
	M2a	26	-19758.8	6.70903	0.005 (99.441%)	1 (0.559%)	103.865 (0.000%)	M1a	0	2	1
	M7	24	-19743.6	6.63735	0.04684	3.82225		M0	80.2765	4	< 0.001
	M8a	25	-19747.6	6.66499	0.03297	0.79746	1 (0.266%)
	M8	26	-19743.4	6.65007	0.05247	4.66595	1 (0.066%)	M7	0.387348	2	0.823927
								M8a	8.38569	1	0.00378187
